# Supplementary material
Source: PubMed Central journal article supplement (PMC7381760)
Supplement: bloodBLD2019002665-suppl1.pdf [file bloodBLD2019002665-suppl1.pdf]

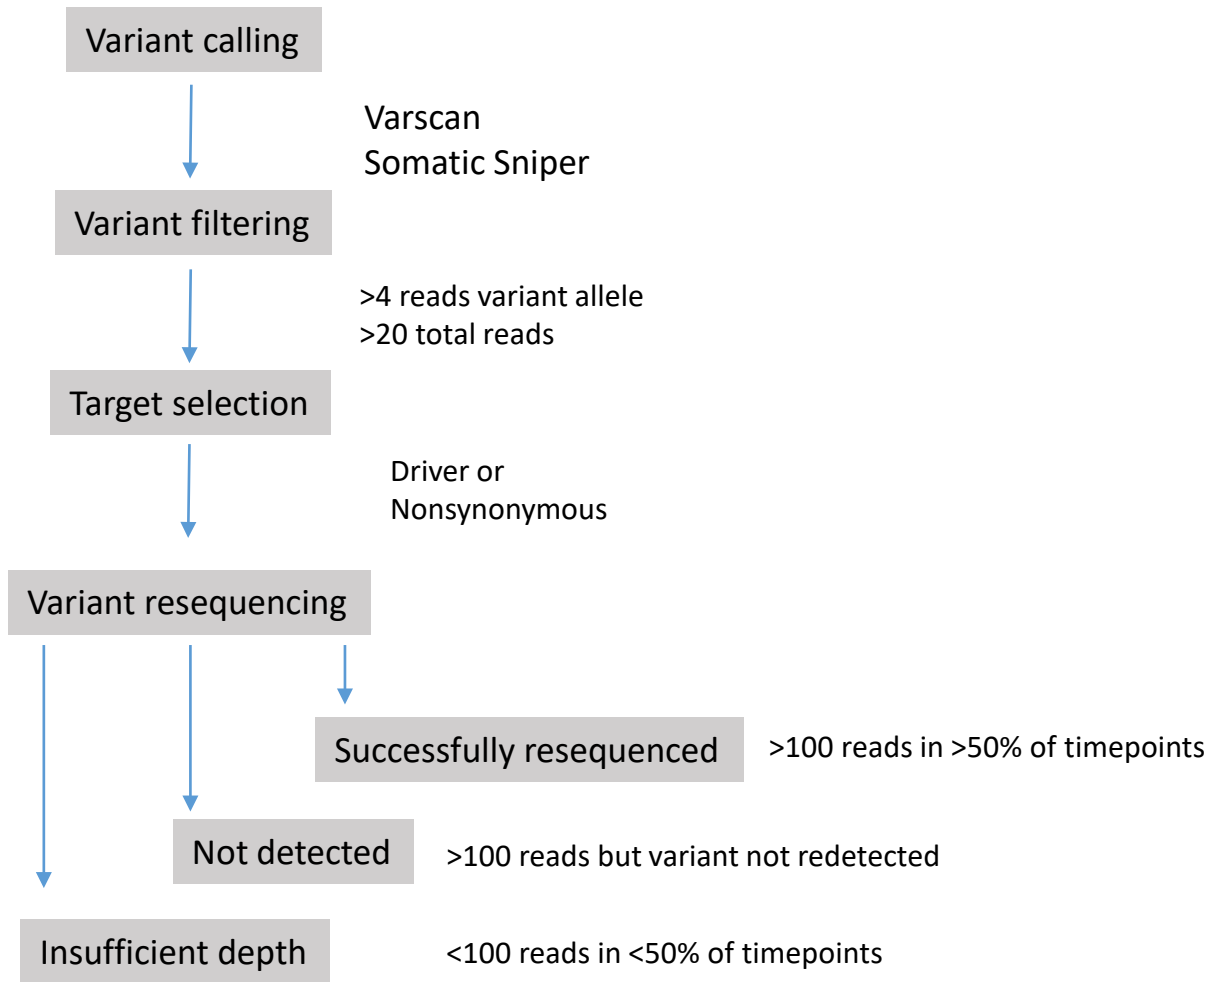

### Supplementary Figure 1

Variant calling analysis pipeline for exome sequencing and capture sequencing with PSTS probes.

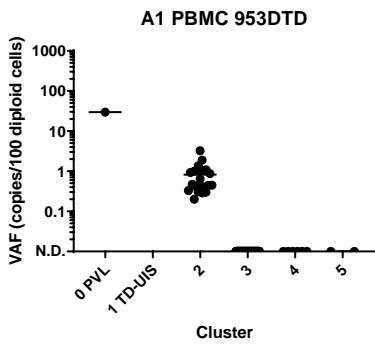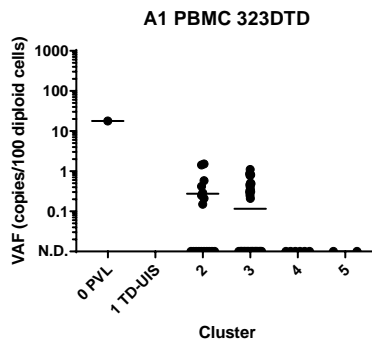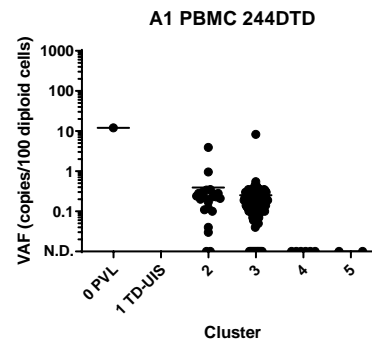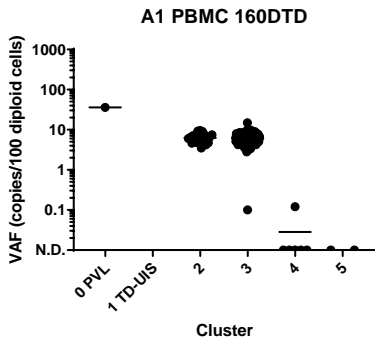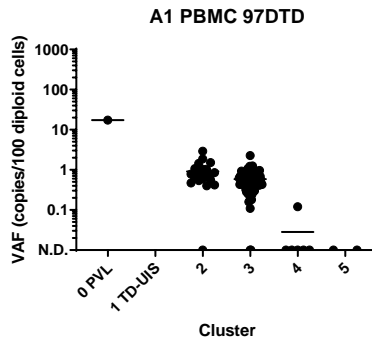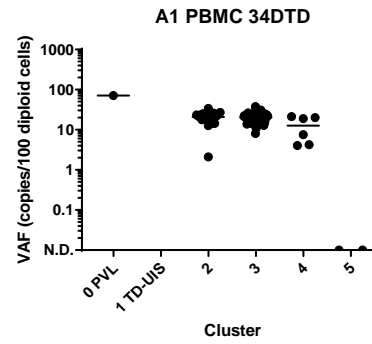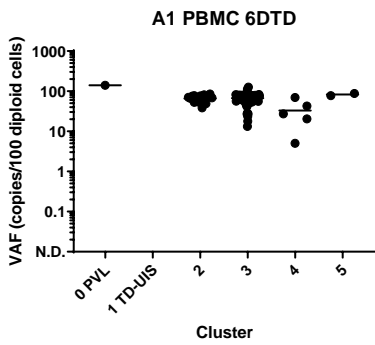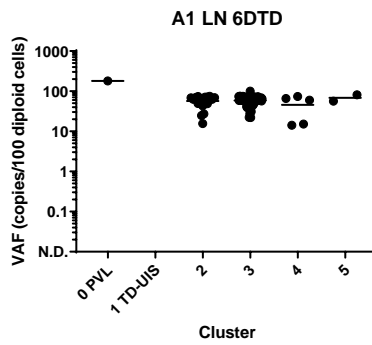

| Driver             | Cluster |
|--------------------|---------|
| HTLV-1 all UIS     | 0       |
| Tumor-dominant UIS | 1       |
| CCR4               | 2       |
| NOTCH1             | 3       |
| PRKCB              | 3       |
| TP53               | 3       |

### Supplementary information 2A.

VAF of somatic mutations over time in PBMC and lymph node (LN) genomic DNA in patient A1. Mutations were placed into clusters on the basis of VAF at each time point. The inset table indicates the cluster in which putative driver events were placed. DTD=Days to diagnosis, UIS= Unique integration site, TD-UIS= Tumor-dominant UIS.

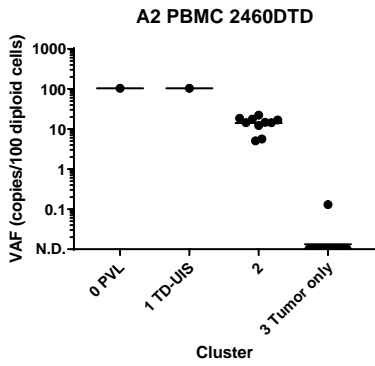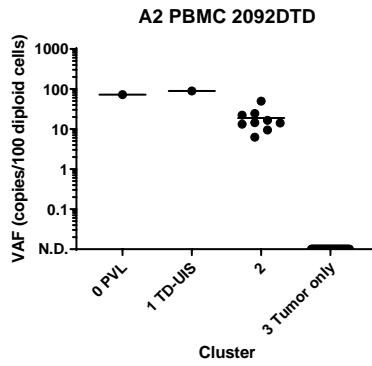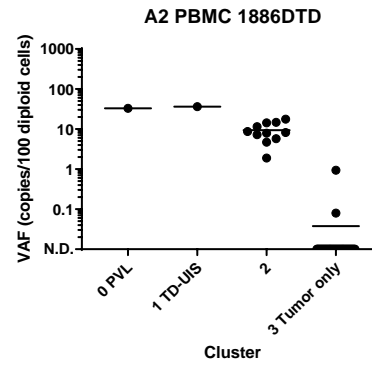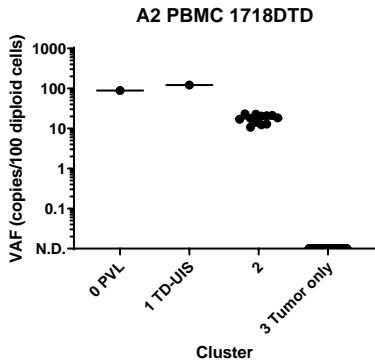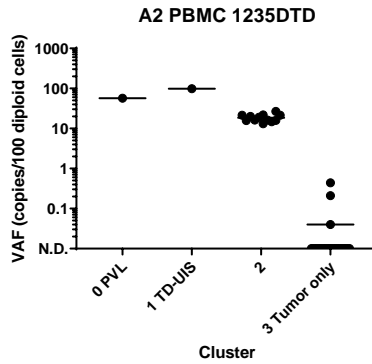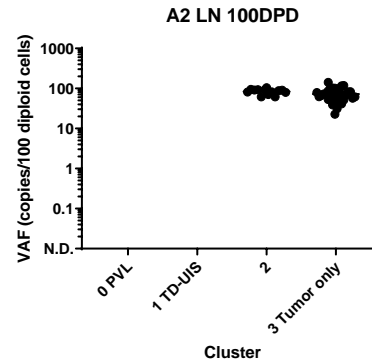

| Driver             | Cluster    |
|--------------------|------------|
| HTLV-1 all UIS     | 0          |
| Tumor-dominant UIS | 1          |
| FYN                | 2          |
| NOXA1              | Tumor only |
| ZFP36L2            | Tumor only |
| ARID2              | Tumor only |

### Supplementary information 2B.

VAf of somatic mutations over time in PBMC and lymph node (LN) genomic DNA in patient A2. Mutations were placed into clusters on the basis of VAF at each time point. The inset table indicates the cluster in which putative driver events were placed. DTD=Days to diagnosis, DPD= Days post diagnosis, UIS= Unique integration site, TD-UIS= Tumor-dominant UIS.

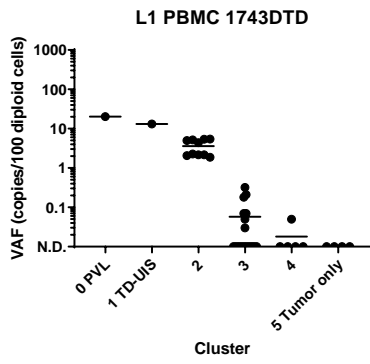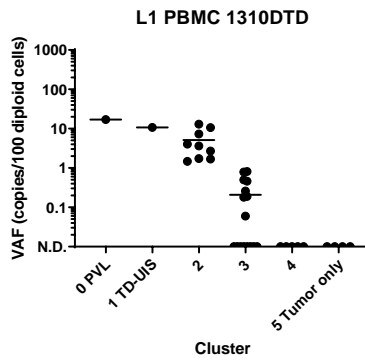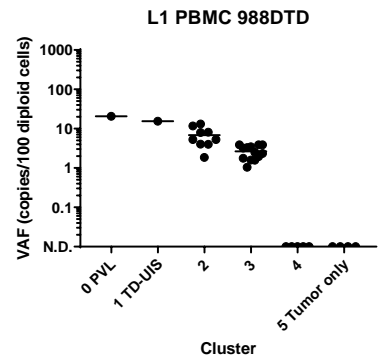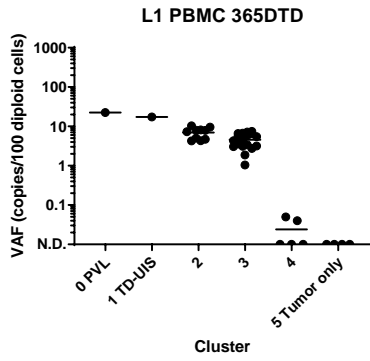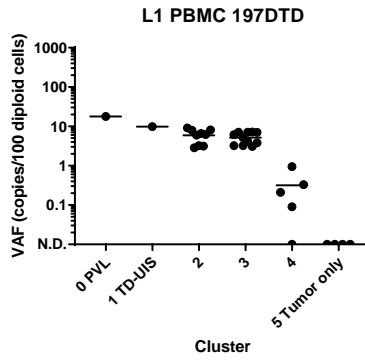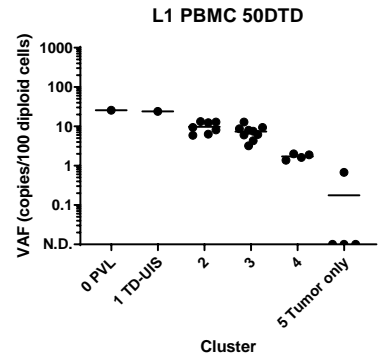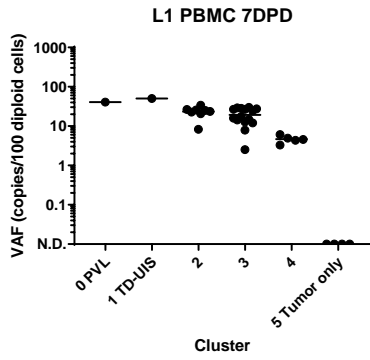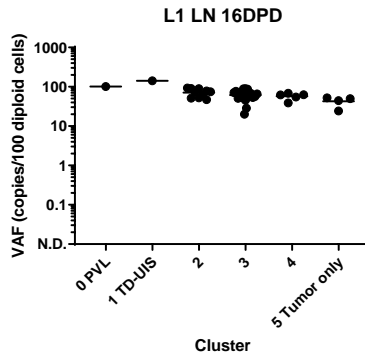

| Driver             | Cluster |
|--------------------|---------|
| HTLV-1 all UIS     | 0       |
| Tumor-dominant UIS | 1       |
| SKI                | 2       |
| PLCG1              | 3       |
| TP53               | 3       |
| VAV1               | 3       |

### Supplementary information 2C.

VAF of somatic mutations over time in PBMC and lymph node (LN) genomic DNA in patient L1. Mutations were placed into clusters on the basis of VAF at each time point. The inset table indicates the cluster in which putative driver events were placed. DTD=Days to diagnosis, DPD= Days post diagnosis, UIS= Unique integration site, TD-UIS= Tumor-dominant UIS.

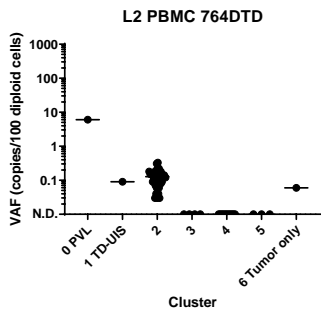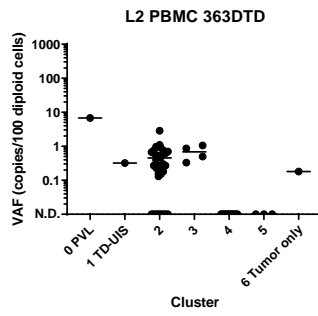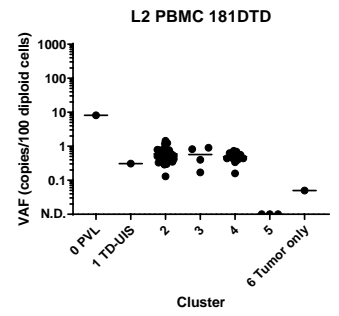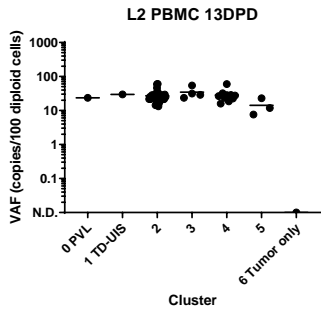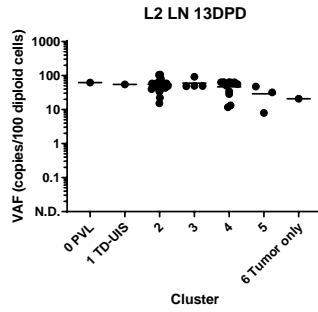

| Driver             | Cluster    |
|--------------------|------------|
| HTLV-1 all UIS     | 0          |
| Tumor-dominant UIS | 1          |
| NOTCH1             | 2          |
| TP53               | 2          |
| TP53               | 2          |
| POT1               | 2          |
| CCR4               | 2          |
| PIK3CD             | 2          |
| GATA3              | 4          |
| PLCG1              | Tumor only |

## Supplementary information 2D.

VAF of somatic mutations over time in PBMC and lymph node (LN) genomic DNA in patient L2. Mutations were placed into clusters on the basis of VAF at each time point. The inset table indicates the cluster in which putative driver events were placed. DTD=Days to diagnosis, DPD= Days post diagnosis, UIS= Unique integration site, TD-UIS= Tumor-dominant UIS.

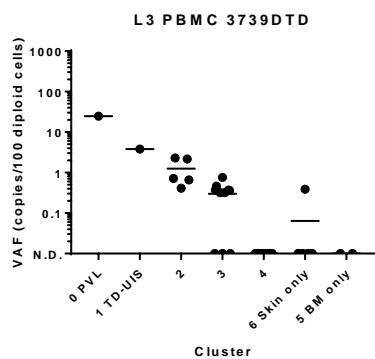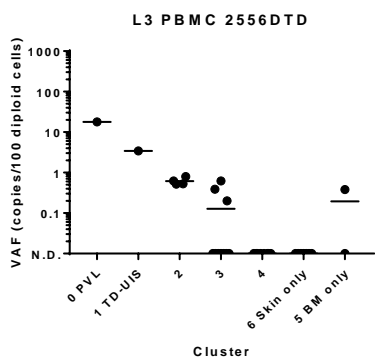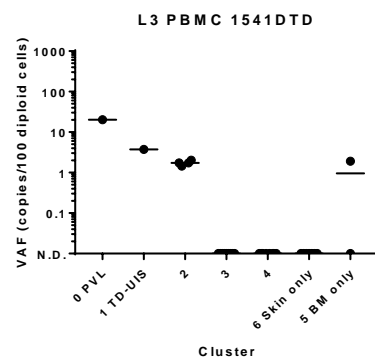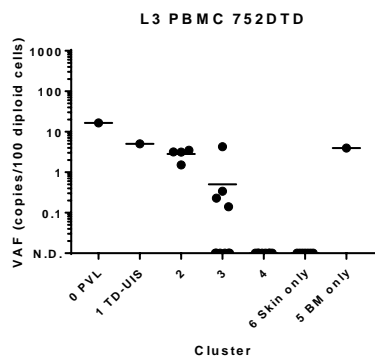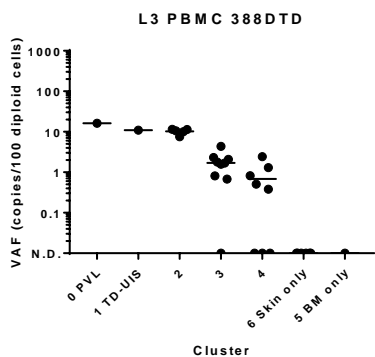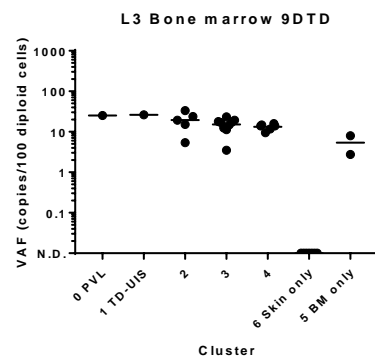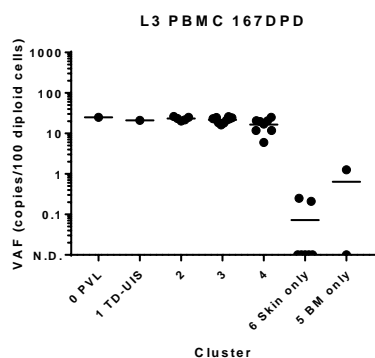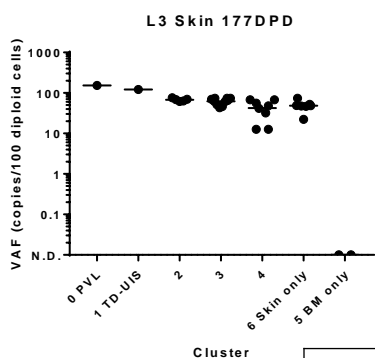

| Driver             | Cluster |
|--------------------|---------|
| HTLV-1 all UIS     | 0       |
| Tumor-dominant UIS | 1       |
| CCR4               | 2       |
| PRKCB              | 3       |
| EP300              | 3       |
| PLCG1              | 4       |
| PLCG1              | 4       |
| CARD11             | BM only |
| PRKCB              | BM only |

## Supplementary information 2E.

VAf of somatic mutations over time in PBMC, Skin (Tumor tissue) and Bone Marrow (BM) genomic DNA in patient L3. Mutations were placed into clusters on the basis of VAF at each time point. The inset table indicates the cluster in which putative driver events were placed. DTD=Days to diagnosis, DPD= Days post diagnosis, UIS= Unique integration site, TD-UIS= Tumor-dominant UIS.

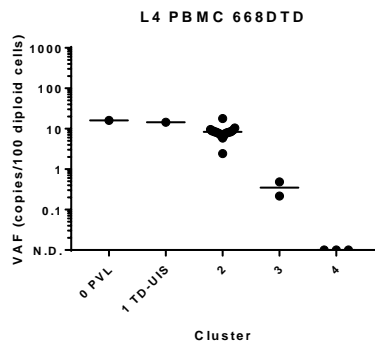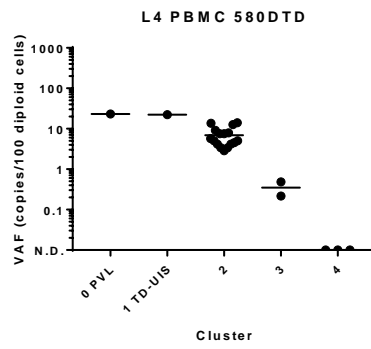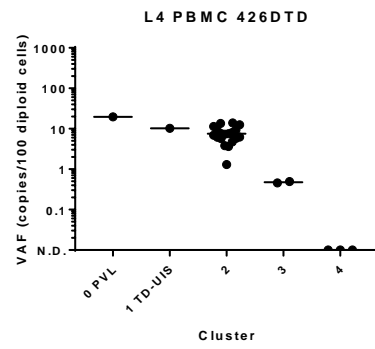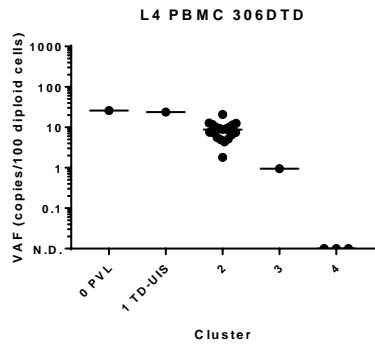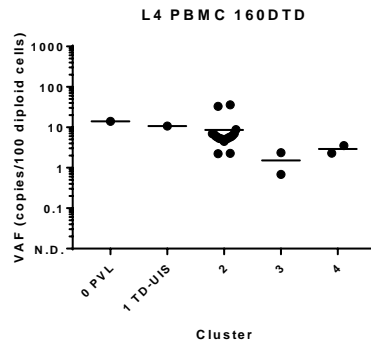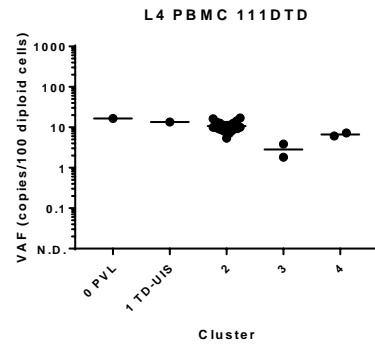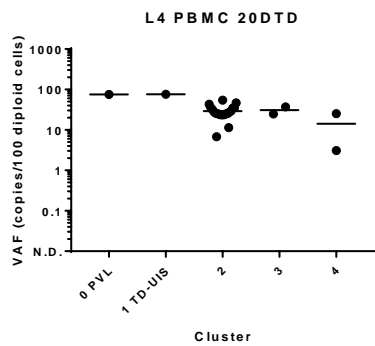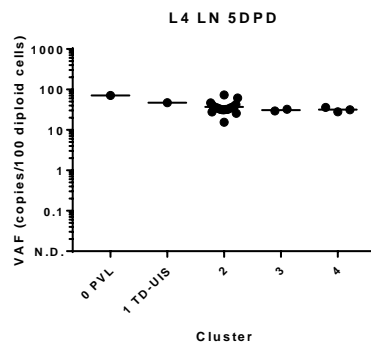

| Driver             | Cluster |
|--------------------|---------|
| HTLV-1 all UIS     | 0       |
| Tumor-dominant UIS | 1       |
| CARD11             | 2       |
| PRKCB              | 2       |
| CSNK2B             | 2       |
| NOTCH1             | 2       |

## Supplementary information 2F.

VAF of somatic mutations over time in PBMC and lymph node (LN) genomic DNA in patient L4.

Mutations were placed into clusters on the basis of VAF at each time point. The inset table indicates the cluster in which putative driver events were placed. DTD=Days to diagnosis, DPD= Days post diagnosis, UIS= Unique integration site, TD-UIS= Tumor-dominant UIS.
